# Supplementary material for: Sphingosine-1-phosphate modulates PAR1-mediated human platelet activation in a concentration-dependent biphasic manner
Source: PubMed Central journal article supplement (PMC8319165; doi:10.1038/s41598-021-94052-4), 2021-07-28

# Supplementary Figure 2

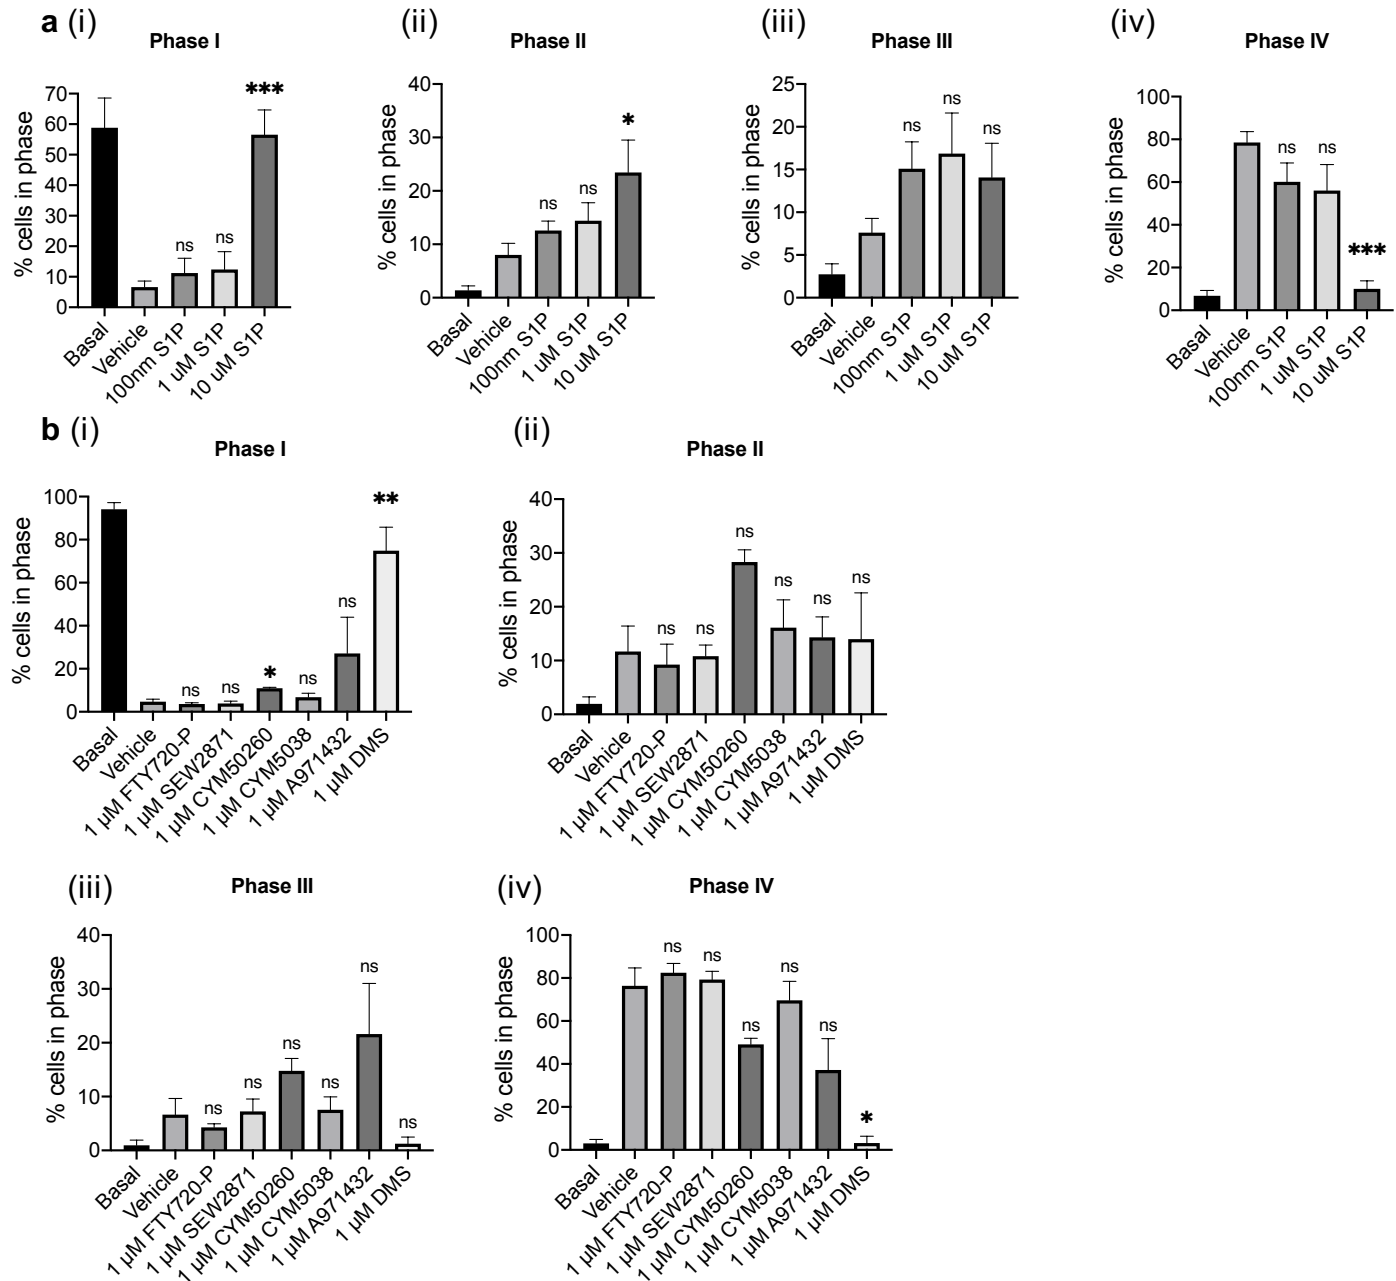

Supplement: 41598_2021_94052_MOESM2_ESM.pdf [file 41598_2021_94052_MOESM2_ESM.pdf]
